# Supplementary material for: Combinatorial genetic replenishments in myocardial and outflow tract tissues restore heart function in tnnt2 mutant zebrafish
Source: PubMed Central journal article supplement (PMC6918781; doi:10.1242/bio.046474), 2019-12-09
Supplement: biolopen-8-046474-s1.pdf [file biolopen-8-046474-s1.pdf]

## Supplemental information

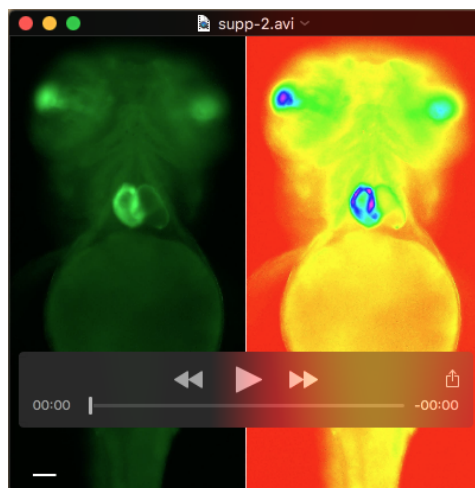

**Movie 1.** Time-elapse video and pseudo-colors of a 3 dpf *Tg(bactin2:GCamp6s); tnnt2a<sup>+/+</sup>* larva from the ventral view.

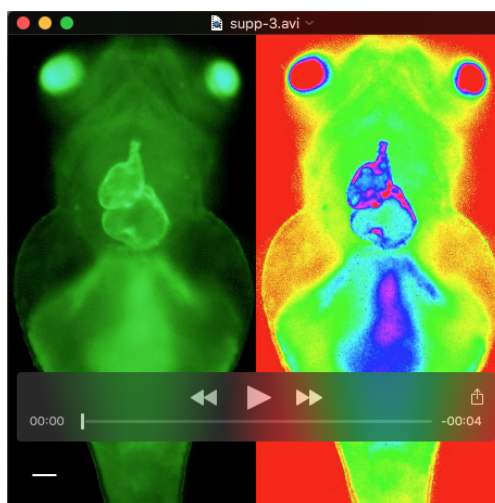

**Movie 2.** Time-elapse video and pseudo-colors of a 3 dpf *Tg(bactin2:GCamp6s); tnnt2a<sup>-/-</sup>* larva from the ventral view.

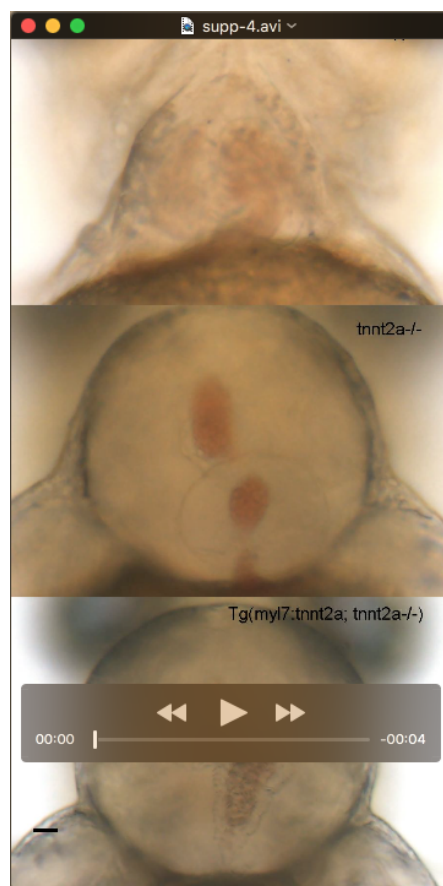

**Movie 3.** Bright field video of the heart regions of wildtype, *tnnt2a<sup>-/-</sup>*, and *Tg(myl7:tnnt2a); tnnt2a<sup>-/-</sup>* zebrafish at 3 dpf.

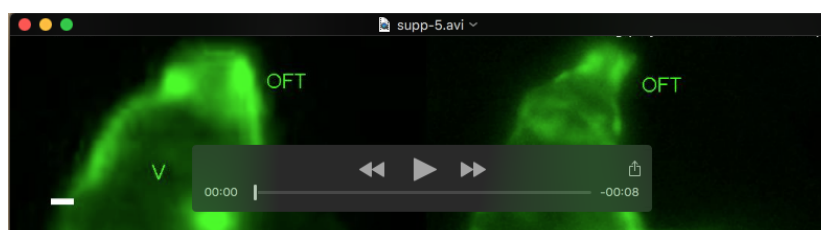

**Movie 4.** Time-elapse video of OFT behavior in wildtype and *Tg(myl7:tnnt2a); tnnt2a<sup>-/-</sup>* zebrafish at 3 dpf.

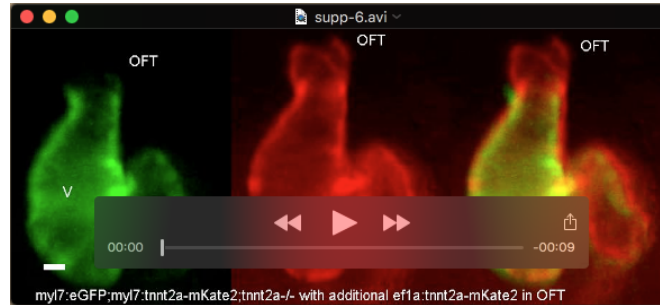

**Movie 5.** Time-elapse video of the heart region in a representative *Tg(myl7:tetOn; tre:tnnt2a-p2a-mKate2; myl7:eGFP); tnnt2a<sup>-/-</sup>* larvae carrying additional red fluorescence of mKate2 (and Tnnt2a) in the OFT (without overlapping green fluorescence).

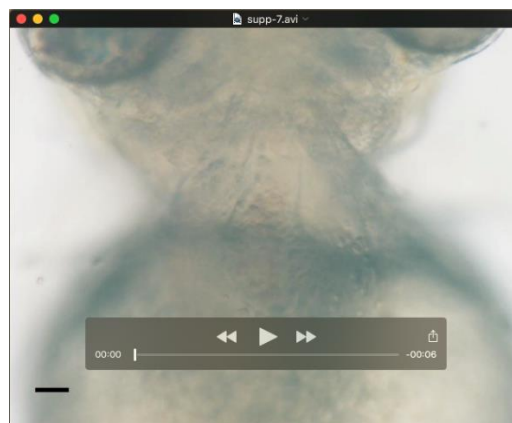

**Movie 6.** Bright field video of a representative double-rescued *tnnt2a<sup>-/-</sup>* heart that was fully functional.

**Supplementary Table****Table S1. Fold changes of sarcomere and valve or OFT relative genes of wildtype and mutant zebrafish in RNA-seq**

|               | <i>tnnt2a</i> <sup>+/+</sup> | <i>tnnt2a</i> <sup>-/-</sup> | log <sub>2</sub> FoldChange ( <i>tnnt2a</i> <sup>-/-</sup> /<br><i>tnnt2a</i> <sup>+/+</sup> ) | P value              | FDR                  |
|---------------|------------------------------|------------------------------|------------------------------------------------------------------------------------------------|----------------------|----------------------|
| <i>tnnt2a</i> | 7.42                         | 0.3                          | -4.6283848                                                                                     | 3.44E <sup>-13</sup> | 5.14E <sup>-12</sup> |
| <i>actc1a</i> | 354.27                       | 397.98                       | 0.16784663                                                                                     | 6.54E <sup>-06</sup> | 4.06E <sup>-05</sup> |
| <i>myl7</i>   | 20.89                        | 28.05                        | 0.42518828                                                                                     | 0.009689             | 0.0284507            |
| <i>tnni1b</i> | 6.91                         | 10                           | 0.53324238                                                                                     | 0.342696             | 0.4976011            |
| <i>tpm4a</i>  | 82.32                        | 112.57                       | 0.45150751                                                                                     | 1.74E <sup>-13</sup> | 2.66E <sup>-12</sup> |
| <i>tnnc1a</i> | 10.89                        | 9.5                          | -0.1970045                                                                                     | 0.221544             | 0.3629792            |
| <i>has2</i>   | 1.02                         | 0.9                          | -0.1805722                                                                                     | 0.704468             | 0.8029169            |
| <i>tbx20</i>  | 2.24                         | 2.38                         | 0.08746284                                                                                     | 0.807426             | 0.8733331            |
| <i>gata4</i>  | 2.24                         | 7.11                         | 1.66635083                                                                                     | 1.1E <sup>-05</sup>  | 6.75E <sup>-05</sup> |
| <i>gata5</i>  | 6.83                         | 7.19                         | 0.07410619                                                                                     | 0.723448             | 0.8153896            |
| <i>tbx2b</i>  | 27.77                        | 23.48                        | -0.2420948                                                                                     | 0.009189             | 0.0271485            |
| <i>bmp2b</i>  | 12.42                        | 9.23                         | -0.4282626                                                                                     | 0.016952             | 0.045948             |

**Table S2. Fold changes of sarcomere and valve or OFT relative genes of wildtype and transgene rescue zebrafish in RNA-seq**

|               | <i>tnnt2a</i> <sup>+/+</sup> | Tg( <i>myl7:tnnt2a</i> );<br><i>tnnt2a</i> <sup>-/-</sup> | log <sub>2</sub> FoldChange<br>(Tg; <i>tnnt2a</i> <sup>-/-</sup> /<br><i>tnnt2a</i> <sup>+/+</sup> ) | P value              | FDR                  |
|---------------|------------------------------|-----------------------------------------------------------|------------------------------------------------------------------------------------------------------|----------------------|----------------------|
| <i>tnnt2a</i> | 7.42                         | 5.25                                                      | -0.4991018                                                                                           | 0.105368             | 0.2108288            |
| <i>actc1a</i> | 354.27                       | 368.28                                                    | 0.05595375                                                                                           | 0.248902             | 0.40047213           |
| <i>myl7</i>   | 20.89                        | 21.1                                                      | 0.01443051                                                                                           | 0.980672             | 0.98679463           |
| <i>tnni1b</i> | 6.91                         | 7.47                                                      | 0.11242253                                                                                           | 0.286924             | 0.44193824           |
| <i>tpm4a</i>  | 82.32                        | 112.5                                                     | 0.45061011                                                                                           | 7.54E <sup>-13</sup> | 1.05E <sup>-11</sup> |
| <i>tnnc1a</i> | 10.89                        | 8.87                                                      | -0.2959979                                                                                           | 0.468862             | 0.63137703           |
| <i>has2</i>   | 1.02                         | 0.51                                                      | -1                                                                                                   | 0.0677928            | 0.148043             |
| <i>tbx20</i>  | 2.24                         | 2.65                                                      | 0.24249363                                                                                           | 0.50083              | 0.65227157           |
| <i>gata4</i>  | 2.24                         | 7.69                                                      | 1.77948487                                                                                           | 2.03E <sup>-06</sup> | 1.37E <sup>-05</sup> |
| <i>gata5</i>  | 6.83                         | 9.1                                                       | 0.41398097                                                                                           | 0.029981             | 0.07629847           |
| <i>tbx2b</i>  | 27.77                        | 27.61                                                     | -0.0083363                                                                                           | 0.869186             | 0.92671892           |
| <i>bmp2b</i>  | 12.42                        | 12.15                                                     | -0.0317089                                                                                           | 0.803724             | 0.87933139           |

**Table S3.** Raw data of the RNA-seq in *tnnt2a*<sup>+/+</sup>; *tnnt2a*<sup>-/-</sup>; Tg(*myl7:tetOn;tre:tnnt2a-p2a-mKate2; myl7:eGFP*); *tnnt2a*<sup>+/+</sup>; Tg(*myl7:tetOn;tre:tnnt2a-p2a-mKate2; myl7:eGFP*); *tnnt2a*<sup>-/-</sup> at 3 dpf.

[Click here to Download Table S3](#)

**Table S4. Primers using in the construction of transgenic zebrafish**

| Primers                           | Sequence                                              |
|-----------------------------------|-------------------------------------------------------|
| pPCRII_ <i>tmt2a</i> cDNA Forward | atgtcagacaacgaagaagt                                  |
| pPCRII_ <i>tmt2a</i> cDNA Reverse | cttcctgaggcctcgcttggttct                              |
| pENTR-5'- <i>cmlc2</i> Forward    | aaagcttaaatcagttgtgt                                  |
| pENTR-5'- <i>cmlc2</i> Reverse    | atggtcactgtctgctttg                                   |
| pENTR-Tetone First Forward        | ggggacaagttgtacaaaaagcaggctggaccatgtctagactggacaagagc |
| pENTR-Tetone First Reverse        | tcttatcatgtctagatcttaccggggagcatgcaa                  |
| pENTR-Tetone Second Forward       | gacatgctccccgggtaagatctagacatgataagatacatt            |
| pENTR-Tetone Second Reverse       | aaggcctcatcgataaactgtttattgcagctta                    |
| pENTR-Tetone Third Forward        | agctgcaataaacaagttatcgatgaggcccttctgt                 |
| pENTR-Tetone Third Reverse        | ggggaccactttgtacaagaaagctgggtgcccgatccaagtataaga      |

**Table S5. Real time RT-PCR primers list**

| <b>Gene</b>    | <b>Forward primers</b> | <b>Reverse primers</b> |
|----------------|------------------------|------------------------|
| <i>tnnt2a</i>  | gcgacagaagcgtttggag*   | ctgagagcagattcattggca  |
| <i>actc1a</i>  | tgatgagactaccgcactcg   | gagcctcgtctcccacatag   |
| <i>myl7</i>    | gaaccgggatggagttatca   | tgggtcattagcagcctctt   |
| <i>tnni1b</i>  | gctggcagataaggaagacg   | tgaggggtaaattcaaacgc   |
| <i>tpm4a</i>   | tgacttctttggacgctgtg   | gcggttctcgattacctca    |
| <i>myh7</i>    | atthtgggtgccagtggaaag  | cctccctctgcttctgtttg   |
| <i>tnnc1a</i>  | gaaccctaccctgaagagc    | ttttgtctccgtccctcatc   |
| <i>mybpc3</i>  | ccaaggaggactgtggacat   | ccagatgaatcttgggagga   |
| <i>has2</i>    | aggtcatgtacaccgccttc   | caagggtccgctgatacatt   |
| <i>gata4</i>   | gctcctctgaaggctcagtcg  | cagaatcaggctgttccaca   |
| <i>gata5</i>   | cgacaacactgtggaggaga   | gtagcgccagacactgttga   |
| <i>gata6</i>   | tatgtcacaccgcagctctc   | agacatgcgcttctgaggtt   |
| <i>tbx20</i>   | gtttgccaaggttcagag     | gctgagggagaggttgcag    |
| <i>tbx2a</i>   | gacgactcatcttgcgaaca   | tctgcttcttttggagga     |
| <i>tbx2b</i>   | gcagagatgctggcattca    | tcgtcttcttctccgcaat    |
| <i>tbx1</i>    | gtttgccaaggttcagag     | ctggtgagtggtgcagaat    |
| <i>bmp2b</i>   | ccagcagagcaaacacgata   | agccactcgtactggcatct   |
| <i>notch1b</i> | cctggatgactgtcagagca   | aagccattgactccatccac   |

\*: *tnnt2a* qPCR forward primer spans the mutation site.

## Supplementary Figures

### Figure S1

A

volcano plot of 3dpf *tnnt2a*<sup>-/-</sup> vs. Tg(*tnnt2a*);*tnnt2a*<sup>-/-</sup> RNA-seq

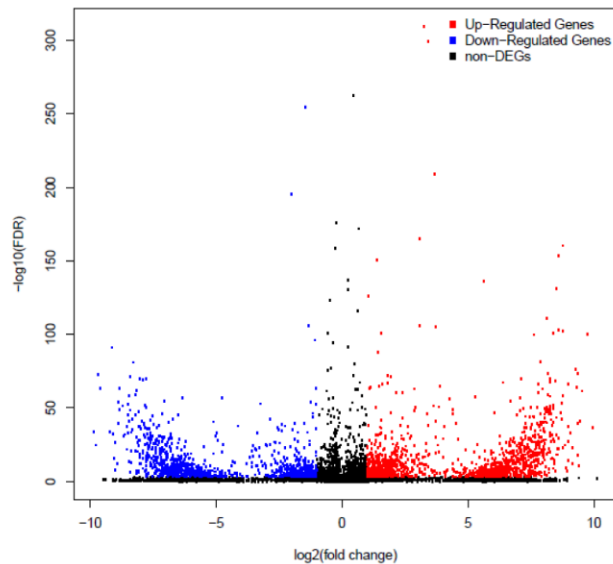

B

volcano plot of 3dpf *tnnt2a*<sup>+/-</sup> vs. *tnnt2a*<sup>-/-</sup> RNA-seq

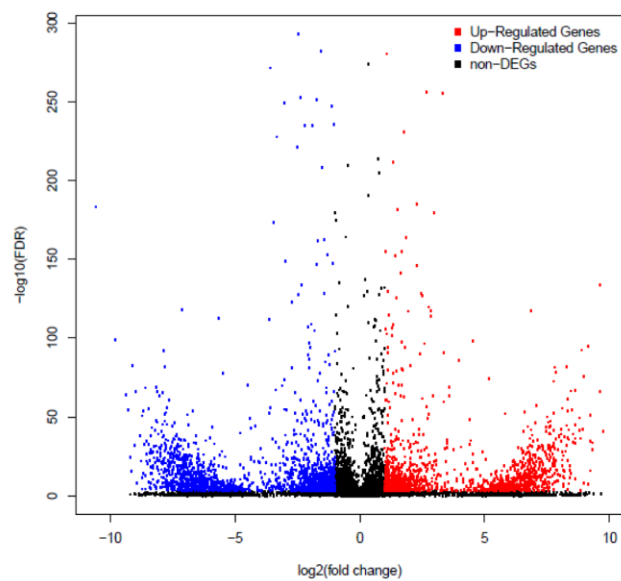

### Figure S1 Volcano plot of RNA-seq

A: Volcano plot of differential expressed genes in *tnnt2a*<sup>-/-</sup> vs Tg(*myl7:TetOn;tre:tnnt2a-mKate2;myl7:eGFP*);*tnnt2a*<sup>-/-</sup>

B: Volcano plot of differential expressed genes in *tnnt2a*<sup>+/-</sup> vs *tnnt2a*<sup>-/-</sup>



**Figure S2**

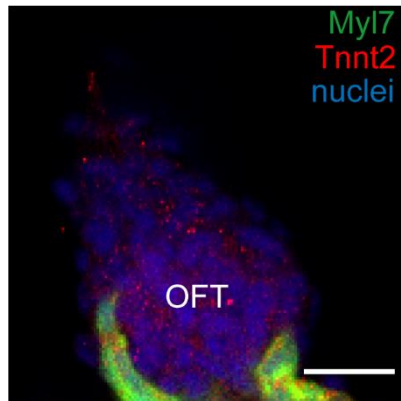

**Figure S2** Cytoplasm localization of Tnnt2 in OFT

Immunofluorescence of Tnnt2 and Myl7 staining in wildtype zebrafish heart outflow tract at 5 dpf: nuclei is stained by Hoechst 33342, OFT: outflow tract; bar: 25  $\mu$ m
